# Supplementary material for: Synthesis, structure and magnetism of homodinuclear complexes of Co, Ni and Cu supported by a novel bitriazine scaffold
Source: Royal Society of Chemistry journal article supplement (doi:10.1039/c1dt00018g), 2011-01-01
Supplement: c1dt00018g.pdf [file c1dt00018g.pdf]

## Supporting Information

### Synthesis, structure and magnetism of homodinuclear complexes of Co, Ni and Cu supported by a novel bitriazine scaffold.

Derek J. Reid,<sup>a</sup> John E. W. Cull,<sup>a</sup> Kimberley D. S. Chisholm,<sup>a</sup> Alexandre Langlois,<sup>a</sup> Po-Heng Lin,<sup>b</sup> Jérôme Long,<sup>b</sup> Olivier Lebel,<sup>a</sup> Iliia Korobkov,<sup>b</sup> Ruiyao Wang,<sup>c</sup> James D. Wuest,<sup>d</sup> Muralee Murugesu<sup>b</sup> and Jennifer Scott\*<sup>a</sup>

<sup>a</sup>*Department of Chemistry and Chemical Engineering, Royal Military College of Canada, Kingston, Canada*

<sup>b</sup>*Department of Chemistry, University of Ottawa, Ottawa, Ontario, Canada*

<sup>c</sup>*Department of Chemistry, Queen's University, Kingston, Ontario, Canada*

<sup>d</sup>*Département de Chimie, Université de Montréal, Montréal, Québec, Canada H3C 3J7*

#### Contents:

1. <sup>1</sup>H NMR spectrum of compound 1.
2. <sup>13</sup>C NMR spectrum of compound 1.
3. Structural representations along the ligand C-C bond and along the metal centers for complexes 2-5.
4. Selected bond distances and angles of complexes 2-5.

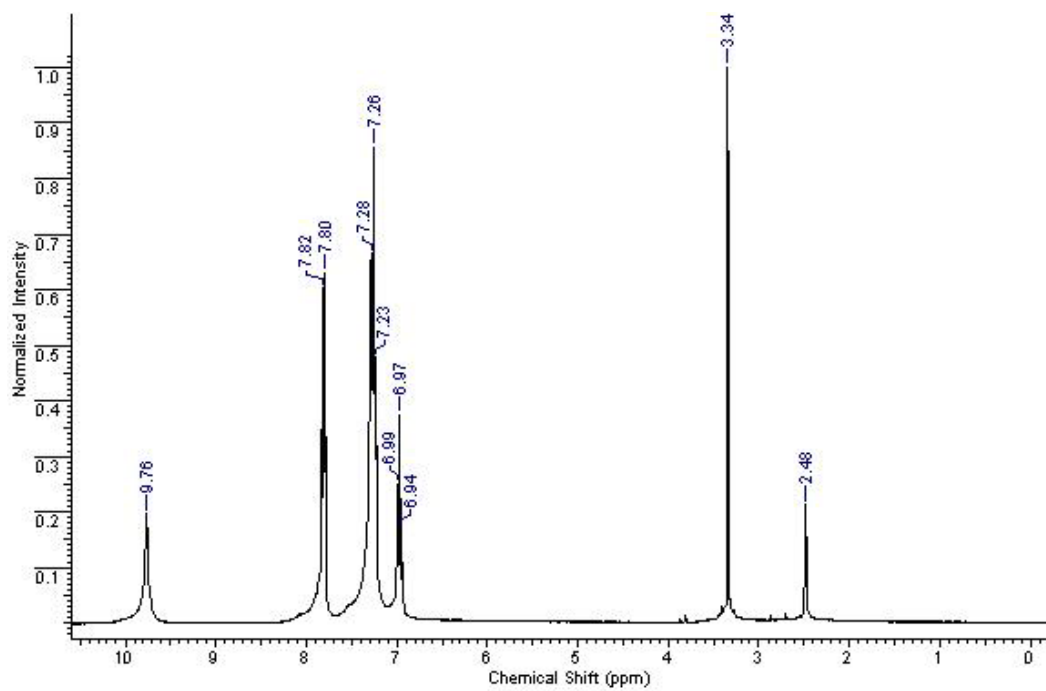

Figure S1. <sup>1</sup>H NMR Spectrum of compound 1.

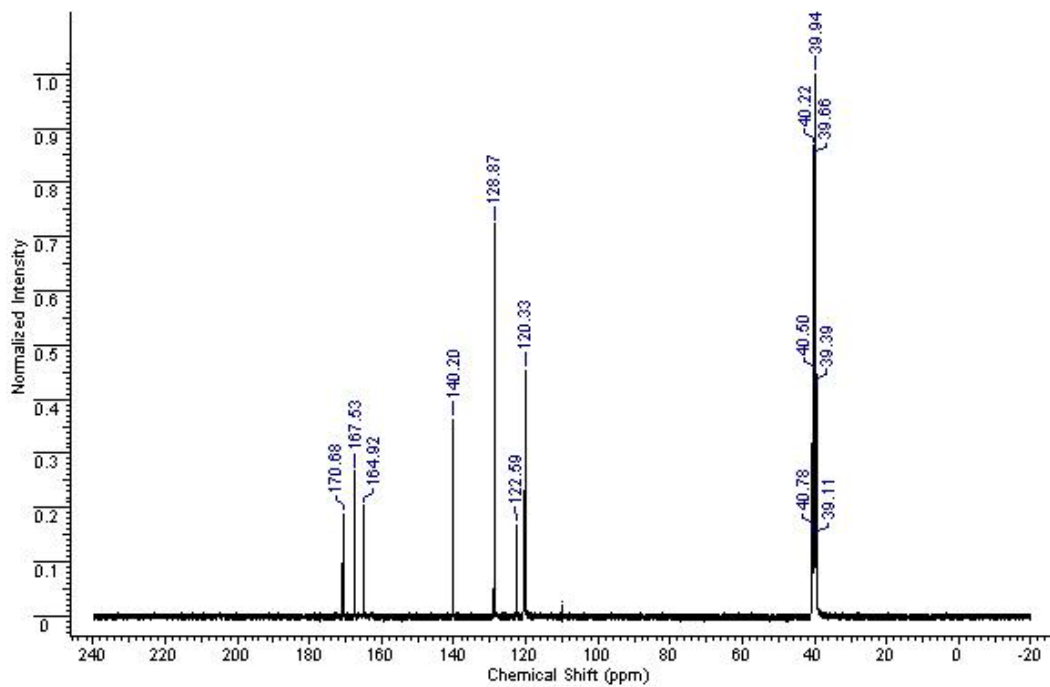

Figure S2.  $^{13}\text{C}$  NMR spectrum of compound 1.

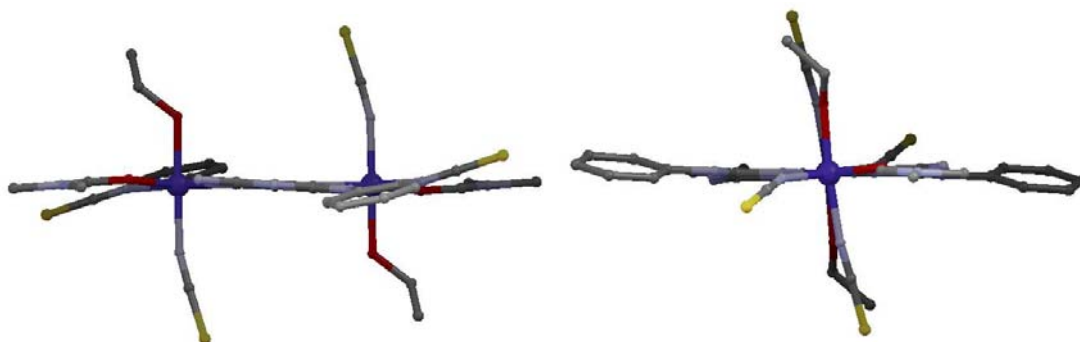

**Figure S3.** Ball and stick model of complex 2 along the C-C bond in the ligand (left) and along the cobalt centers (right).

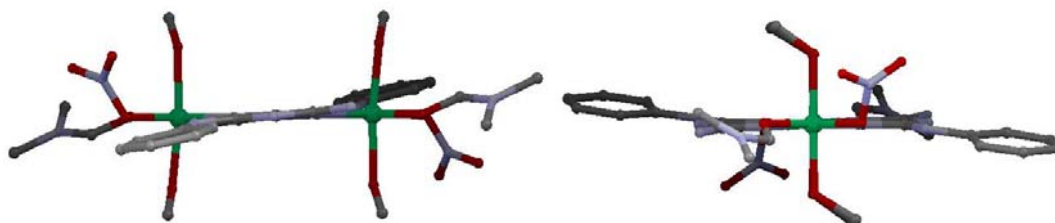

**Figure S4.** Ball and stick model of complex 3 along the C-C bond in the ligand (left) and along the nickel centers (right).

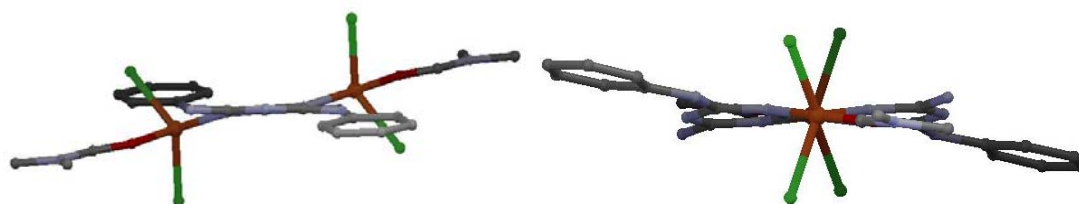

**Figure S5.** Ball and stick model of complex 4 along the C-C bond in the ligand (left) and along the copper centers (right).

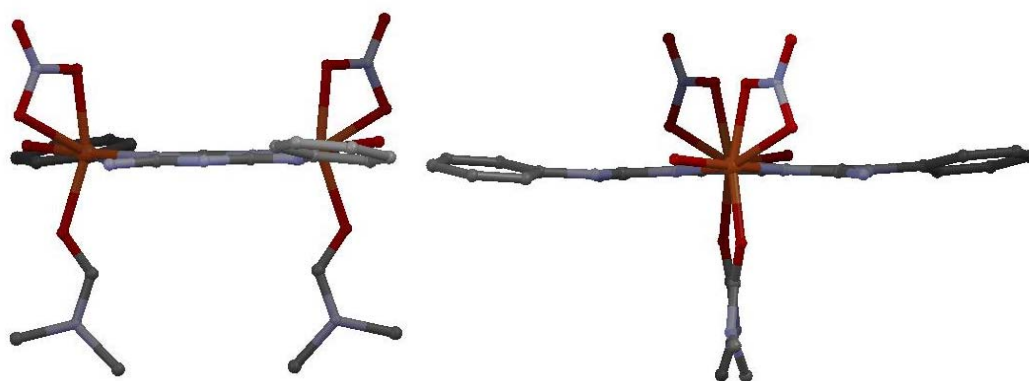

**Figure S6.** Ball and stick model of complex 5 along the C-C bond in the ligand (left) and along the copper centers (right).

**Table S1. Selected Bond Distances (Å) and Angles (deg) for complex 2**

|                  |            |                  |            |
|------------------|------------|------------------|------------|
| Co(1)-N(7)       | 2.056(5)   | N(7)-C(15)       | 1.142(6)   |
| Co(1)-O(2)       | 2.058(4)   | N(8)-C(16)       | 1.159(6)   |
| Co(1)-N(8)       | 2.071(4)   | S(1)-C(15)       | 1.630(6)   |
| Co(1)-O(1)       | 2.158(3)   | S(2)-C(16)       | 1.592(6)   |
| Co(1)-N(3a)      | 2.180(4)   | C(3)-C(3a)       | 1.521(9)   |
| Co(1)-N(1)       | 2.188(4)   | Co(1)...Co(1a)   | 5.828      |
|                  |            |                  |            |
| N(7)-Co(1)-O(2)  | 174.90(17) | N(7)-Co(1)-N(1)  | 94.57(16)  |
| N(7)-Co(1)-N(8)  | 93.57(17)  | O(2)-Co(1)-N(1)  | 87.75(14)  |
| O(2)-Co(1)-N(8)  | 90.50(16)  | N(8)-Co(1)-N(1)  | 99.91(15)  |
| N(7)-Co(1)-O(1)  | 89.22(16)  | O(1)-Co(1)-N(1)  | 169.51(13) |
| O(2)-Co(1)-O(1)  | 87.74(14)  | N(3a)-Co(1)-N(1) | 175.29(16) |
| N(8)-Co(1)-O(1)  | 89.59(15)  | C(15)-N(7)-Co(1) | 164.9(4)   |
| N(7)-Co(1)-N(3a) | 85.93(16)  | C(16)-N(8)-Co(1) | 157.9(4)   |
| O(2)-Co(1)-N(3a) | 90.26(14)  | N(7)-C(15)-S(1)  | 177.3(5)   |
| N(8)-Co(1)-N(3a) | 175.29(16) | N(8)-C(16)-S(2)  | 179.0(5)   |
| O(1)-Co(1)-N(3a) | 95.09(13)  |                  |            |

**Table S2. Selected Bond Distances (Å) and Angles (deg) for complex 3**

|                  |            |                  |            |
|------------------|------------|------------------|------------|
| Ni(1)-O(3)       | 2.0462(12) | O(4)-N(7)        | 1.315(2)   |
| Ni(1)-O(1)       | 2.0561(15) | O(5)-N(7)        | 1.216(2)   |
| Ni(1)-O(2)       | 2.0603(14) | O(6)-N(7)        | 1.211(2)   |
| Ni(1)-O(4)       | 2.0943(13) | O(7)-N(8)        | 1.238(2)   |
| Ni(1)-N(2a)      | 2.0992(14) | O(8)-N(8)        | 1.243(2)   |
| Ni(1)-N(1)       | 2.1231(13) | O(9)-N(8)        | 1.259(2)   |
| C(1)-C(1a)       | 1.500(3)   | H(1H)...O(7)     | 2.19(2)    |
| Ni(1)...Ni(1a)   | 5.645      |                  |            |
| O(3)-Ni(1)-O(1)  | 89.90(6)   | O(1)-Ni(1)-N(1)  | 89.36(6)   |
| O(3)-Ni(1)-O(2)  | 87.52(5)   | O(2)-Ni(1)-N(1)  | 93.84(5)   |
| O(1)-Ni(1)-O(2)  | 173.50(6)  | O(4)-Ni(1)-N(1)  | 96.71(5)   |
| O(3)-Ni(1)-O(4)  | 89.26(5)   | N(2a)-Ni(1)-N(1) | 78.39(5)   |
| O(1)-Ni(1)-O(4)  | 88.26(6)   | N(7)-O(4)-Ni(1)  | 119.24(11) |
| O(2)-Ni(1)-O(4)  | 85.75(6)   | O(5)-N(7)-O(4)   | 118.06(17) |
| O(3)-Ni(1)-N(2a) | 95.65(5)   | O(6)-N(7)-O(5)   | 123.3(2)   |
| O(1)-Ni(1)-N(2a) | 92.35(6)   | O(6)-N(7)-O(4)   | 118.64(18) |
| O(2)-Ni(1)-N(2a) | 93.84(6)   | O(7)-N(8)-O(8)   | 120.40(18) |
| O(4)-Ni(1)-N(2a) | 175.06(5)  | O(7)-N(8)-O(9)   | 119.94(18) |
| O(3)-Ni(1)-N(1)  | 173.96(5)  | O(8)-N(8)-O(9)   | 119.63(18) |

**Table S3. Selected Bond Distances (Å) and Angles (deg) for complex 4**

|                  |            |                   |           |
|------------------|------------|-------------------|-----------|
| Cu(1)-O(1)       | 1.9607(15) | Cu(1)-Cl(2)       | 2.2907(7) |
| Cu(1)-N(1)       | 2.0163(16) | Cu(1)-Cl(1)       | 2.3214(6) |
| Cu(1)-N(2a)      | 2.1805(15) | C(1)-C(1a)        | 1.500(4)  |
| Cu(1)...Cu(1A)   | 5.584      |                   |           |
| O(1)-Cu(1)-N(1)  | 172.05(6)  | N(2a)-Cu(1)-Cl(2) | 113.07(5) |
| O(1)-Cu(1)-N(2a) | 93.68(6)   | O(1)-Cu(1)-Cl(1)  | 90.58(5)  |
| N(1)-Cu(1)-N(2a) | 78.38(6)   | N(1)-Cu(1)-Cl(1)  | 93.60(5)  |
| O(1)-Cu(1)-Cl(2) | 92.69(6)   | N(2a)-Cu(1)-Cl(1) | 118.62(5) |
| N(1)-Cu(1)-Cl(2) | 90.08(5)   | Cl(2)-Cu(1)-Cl(1) | 127.85(2) |



**Table S4. Selected Bond Distances (Å) and Angles (deg) for complex 5**

|                  |            |                  |           |
|------------------|------------|------------------|-----------|
| Cu(1)-O(5)       | 1.9739(17) | N(6)-O(3)        | 1.199(3)  |
| Cu(1)-O(4)       | 2.0117(18) | N(6)-O(2)        | 1.256(4)  |
| Cu(1)-N(2a)      | 2.0129(19) | N(6)-O(1)        | 1.249(4)  |
| Cu(1)-O(2)       | 2.071(3)   | N(8)-O(7)        | 1.208(4)  |
| Cu(1)-N(1)       | 2.2086(19) | N(8)-O(6)        | 1.223(3)  |
| Cu(1)-O(1)       | 2.429(4)   | N(8)-O(8)        | 1.256(3)  |
| C(1)-C(1a)       | 1.497(4)   | Cu(1)...Cu(1A)   | 5.634     |
|                  |            |                  |           |
| O(5)-Cu(1)-O(4)  | 87.47(8)   | O(2)-Cu(1)-O(1)  | 55.43(10) |
| O(5)-Cu(1)-N(2a) | 172.12(7)  | N(1)-Cu(1)-O(1)  | 160.22(8) |
| O(4)-Cu(1)-N(2a) | 96.57(8)   | O(4)-Cu(1)-O(1)  | 96.14(9)  |
| O(5)-Cu(1)-O(2)  | 87.94(8)   | N(2a)-Cu(1)-O(1) | 99.81(8)  |
| O(4)-Cu(1)-O(2)  | 151.45(11) | O(3)-N(6)-O(2)   | 120.5(3)  |
| N(2a)-Cu(1)-O(2) | 91.64(8)   | O(3)-N(6)-O(1)   | 124.2(4)  |
| O(5)-Cu(1)-N(1)  | 94.27(7)   | O(2)-N(6)-O(1)   | 115.4(3)  |
| O(4)-Cu(1)-N(1)  | 103.64(8)  | O(7)-N(8)-O(6)   | 120.9(3)  |
| N(2a)-Cu(1)-N(1) | 78.22(7)   | O(7)-N(8)-O(8)   | 120.3(3)  |
| O(2)-Cu(1)-N(1)  | 104.80(9)  | O(6)-N(8)-O(8)   | 118.8(2)  |
| O(5)-Cu(1)-O(1)  | 86.43(8)   |                  |           |
